# Supplementary material
Source: publisher site journal article supplement (https://www.dovepress.com/article/375250)

Supplementary material 1: The genome location of CTSZ (A). B: The diagnostic value of elevated CTSZ expression in ccRCC, KIRP and KICH patients. C: Comprehensive analysis of CTSZ expression differences between normal controls and kidney cancer patients based on analyses of thirteen Oncomine databases.


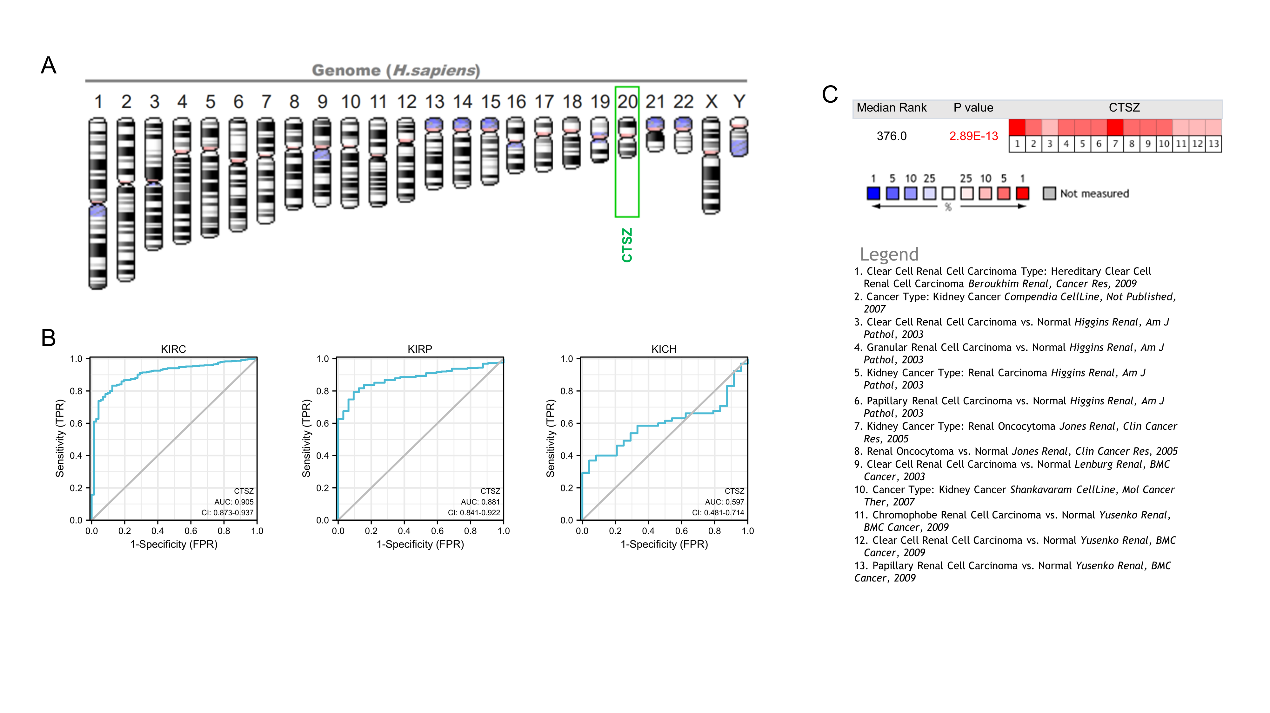


Supplementary material 2: Univariate and multivariate Cox proportional hazards models containing age, sex and CTSZ level in ccRCC (A) and KICH (B). C: Co-expression correlation between CTSZ and CD68, CD163, CD86, CD4 or CD8A in single cells (Review material 4B)


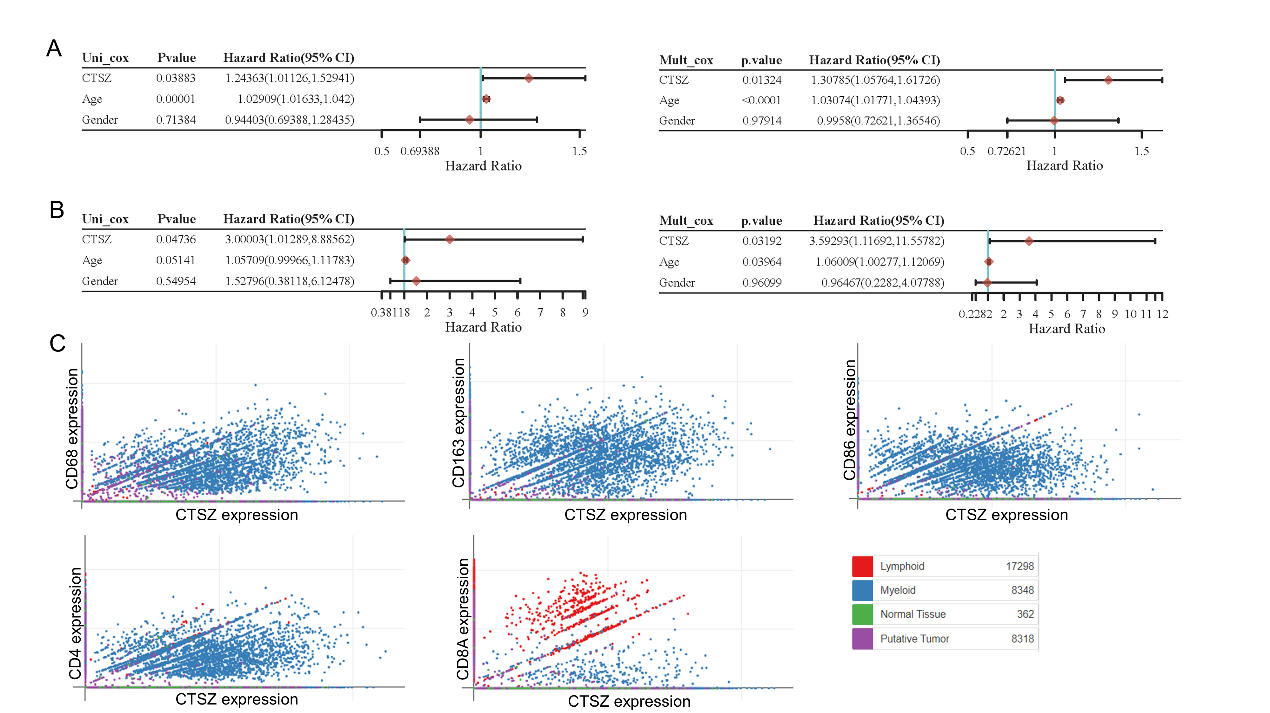


Supplementary material 3: GSEA of CTSZ-correlated gene sets with the top 10 NES (normalized enrichment score) through Joy Plot.


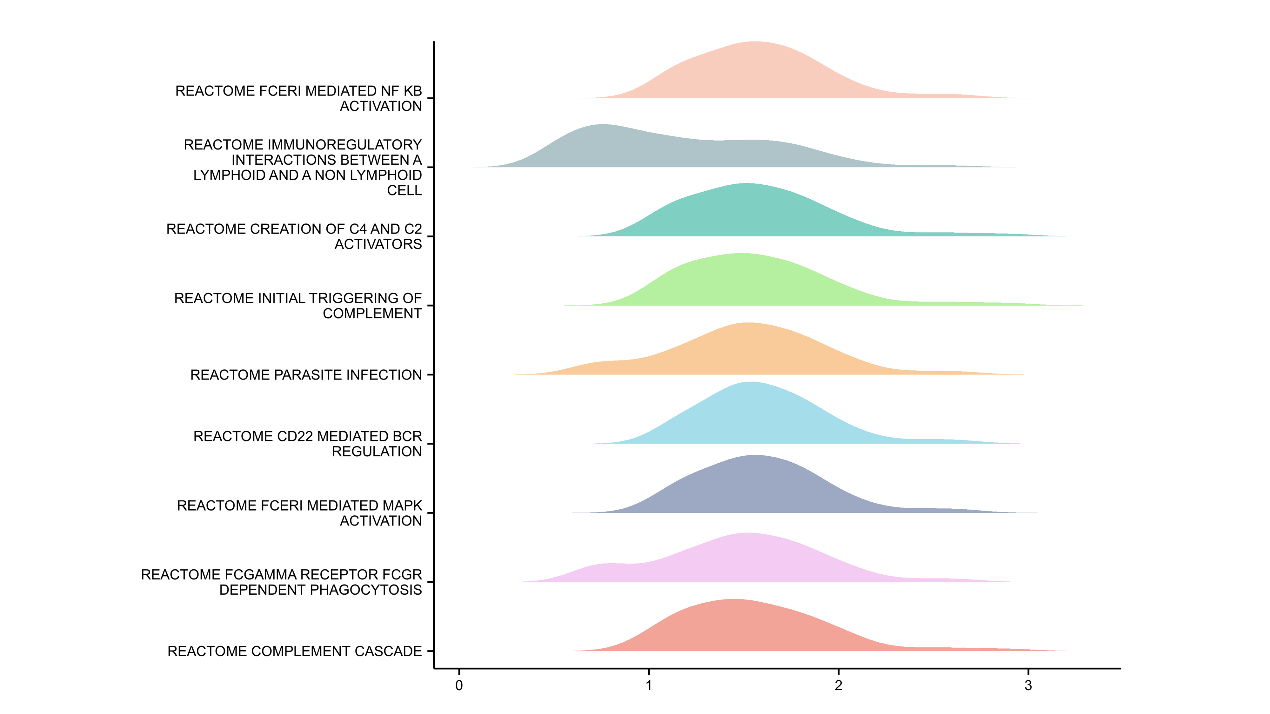


Supplementary material 4: CTSZ-correlated GSEA profiles. A: FceRI mediated NF KB activation. B: Immunoregulatory interactions between lymphoid and nonlymphoid cells. C: Creation of c4 and c2 activators. D: Initial triggering of complement. E: Complement cascade. F: Signaling by the B-cell receptor BCR. G: Type II interferon signaling IFNG. H: Regulation of IFNG signaling. I: IRF3-mediated induction of type I IFN.


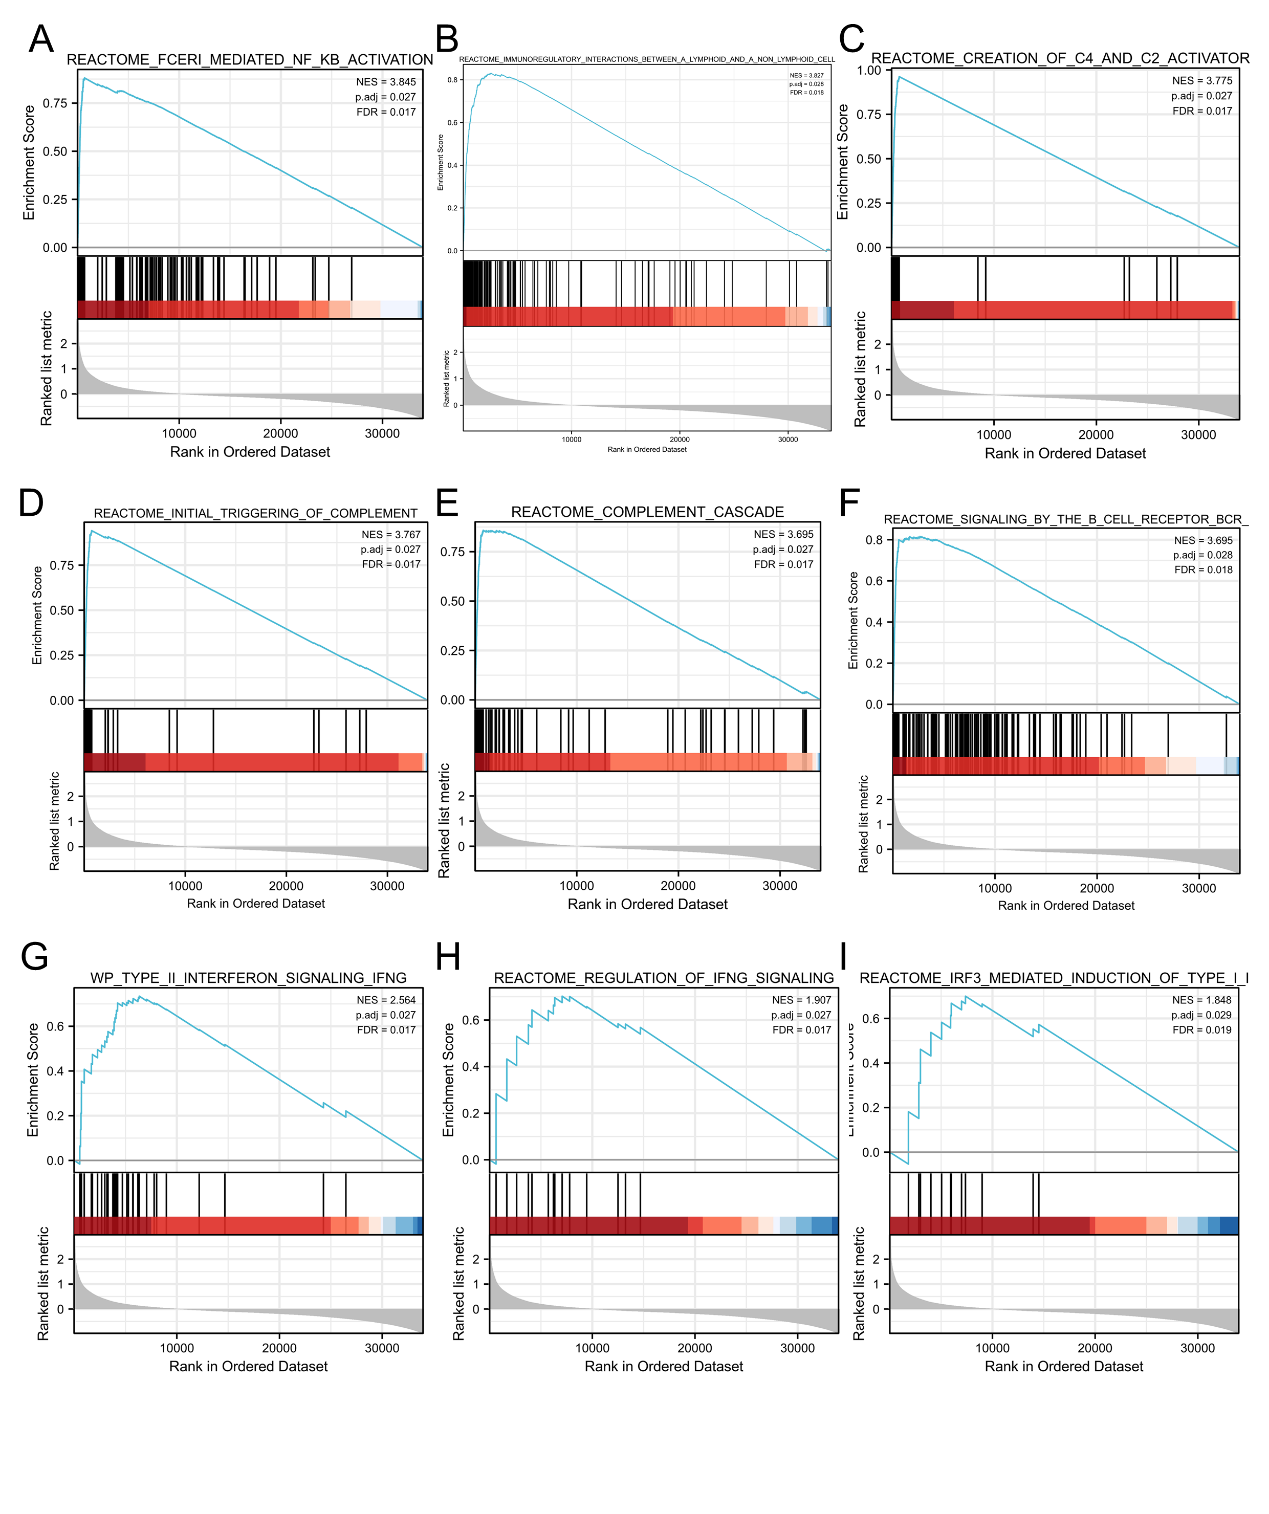


Supplementary material 5: CTSZ promoter methylation and clinicopathological parameters, including race, sex, age and nodal metastasis status, in ccRCC (A). The correlations between CTSZ methylation and gene expression levels in ccRCC (B).


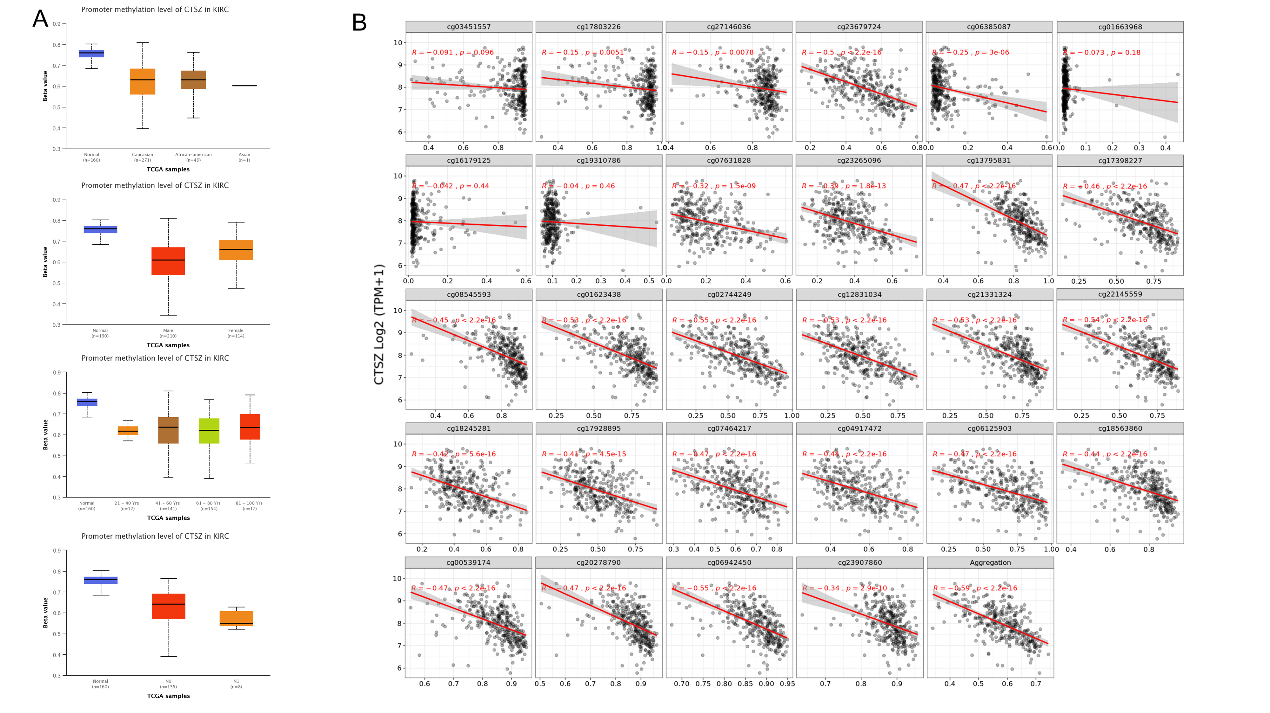


Supplementary material 6: Survival curve of certain probe methylation levels for OS in ccRCC.


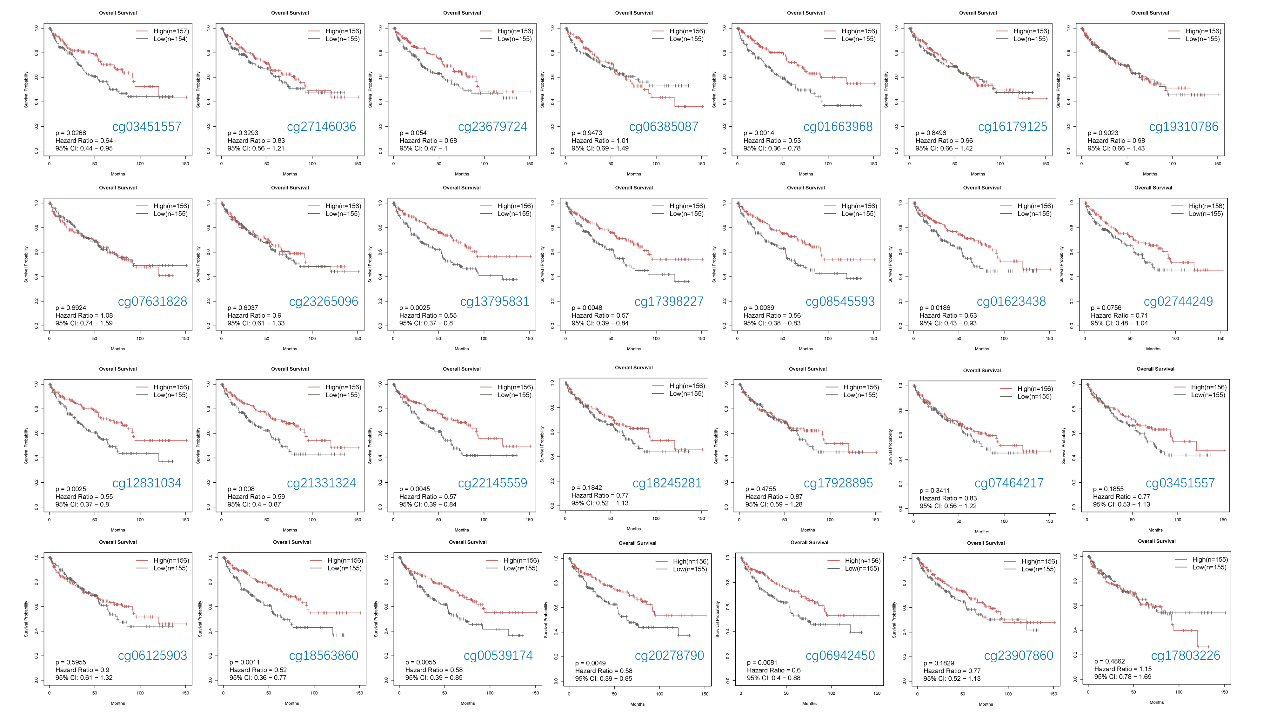


Supplementary material 7: The role of CTSZ in the famous cancer-related pathways (A) in ccRCC (GSCALite). IC50 scores of common ccRCC drugs (axitinib, pazopanib, erlotinib, temsirolimus and sunitinib) between groups with different CTSZ levels (B). Group 1: High CTSZ expression. Group 2: Low CTSZ expression. *p < 0.05, **p < 0.01, ***p < 0.001.


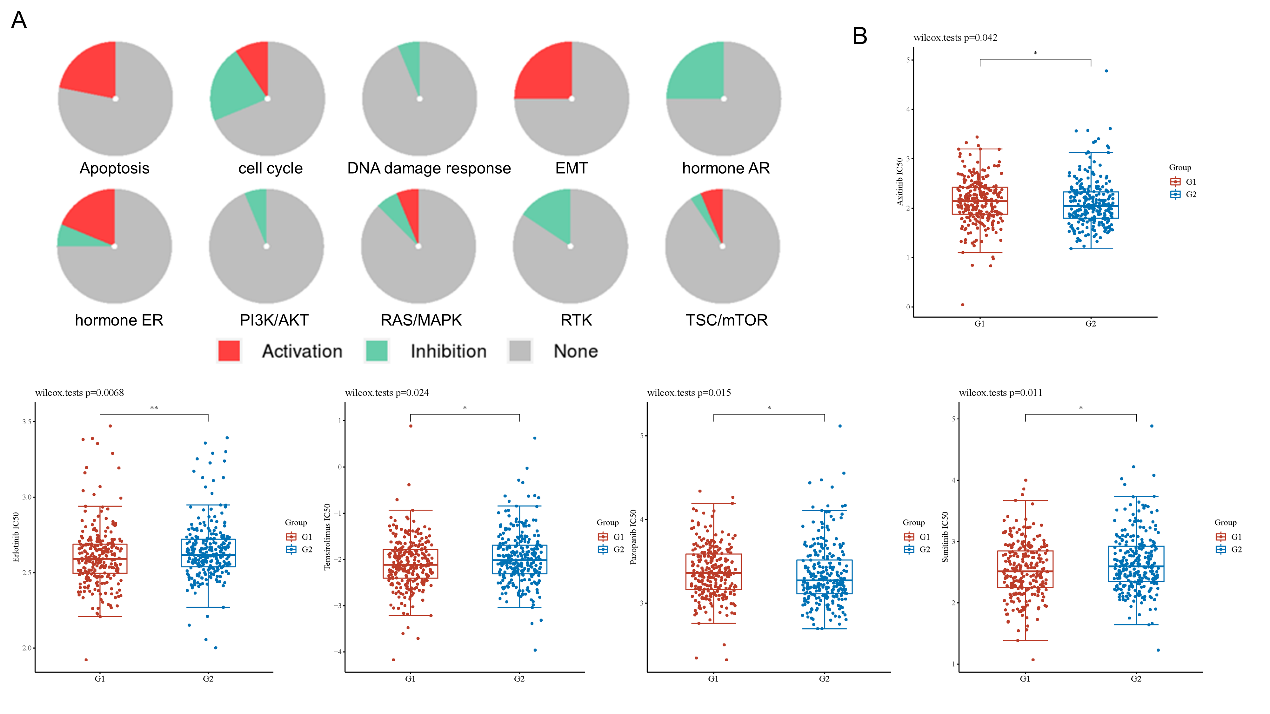


Supplementary material 8: Correlation between CTSZ expression and small molecule/drug sensitivity (IC50) based on the CTRP database. IC50, half-inhibitory concentration. CTRP, Cancer Therapeutics Response Portal.


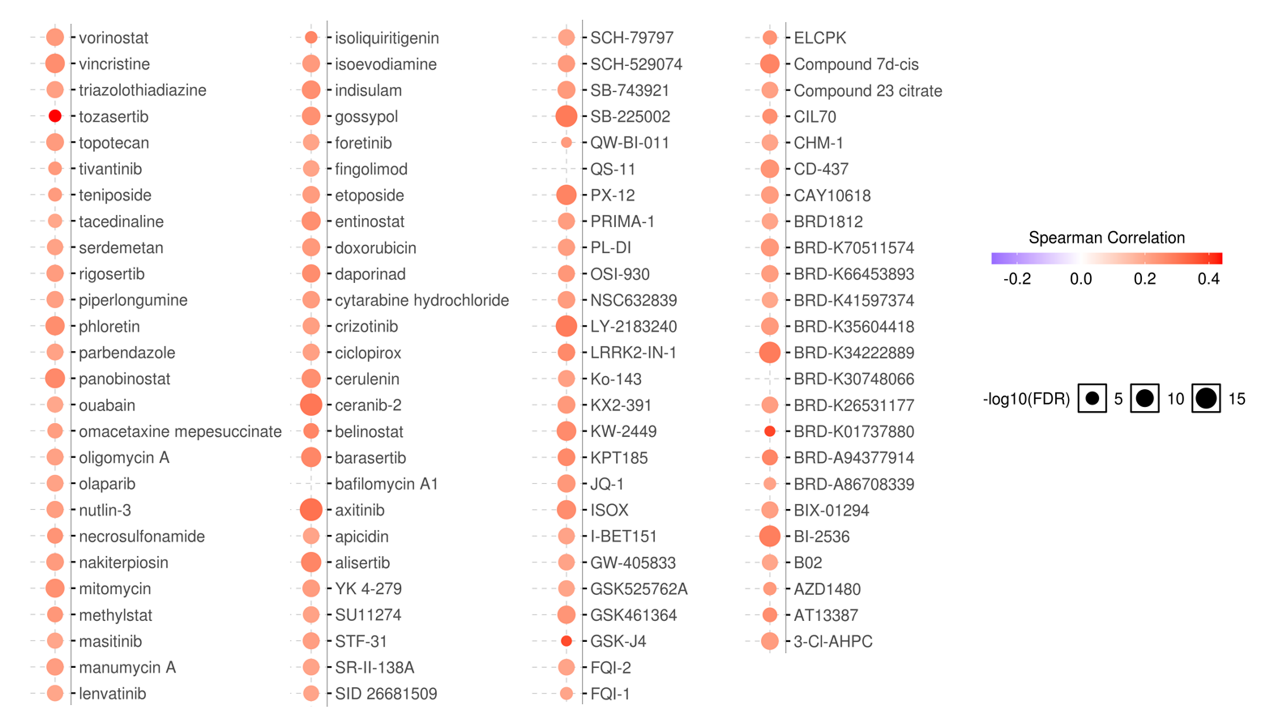

Supplement: Supplementary file 1 [file get_supplementary_file.php]
